# Supplementary material
Source: PubMed Central journal article supplement (PMC3299819)
Supplement: NIHMS360057-supplement-Supplementary_Information.pdf [file NIHMS360057-supplement-Supplementary_Information.pdf]

## Using personal glucose meters and functional DNA sensors to quantify a variety of analytical targets

Yu Xiang and Yi Lu\*

*Department of Chemistry, University of Illinois at Urbana-Champaign, Urbana, IL 61801, USA*

Correspondence and requests for materials should be addressed to Yi Lu ([yi-lu@illinois.edu](mailto:yi-lu@illinois.edu)).

This supplementary information includes:

- (1) **Materials and methods** (Page 2~3)
- (2) **Procedures for the synthesis of DNA-invertase conjugate** (Page 3~5)
- (3) **PAGE characterization of the DNA-invertase conjugates** (Page 5~6)
- (4) **Preparation of the DNA-invertase-immobilized magnetic beads for the detection of targets using a commercially available personal glucose meter** (Page 6~7)
- (5) **Procedures for cocaine, adenosine, IFN- $\gamma$ , and UO<sub>2</sub><sup>2+</sup> detection using a commercially available PGM** (Page 8)
- (6) **Optimized procedure for cocaine detection** (Page 8~13)
- (7) **Other Supplementary figures for cocaine detections** (Page 14~15)
- (8) **Simplifying the sensing procedure into a single step before PGM detection** (Page 15~17)
- (9) **Possible reasons for the PGM signal saturated at a lower IFN- $\gamma$  concentration in 20% serum than in Buffer C** (Page 17)

## 1. Materials and methods

The brand name of the glucose meter used for the tests in this work was *ACCU-CHEK Avia*. Another two brands of glucose meters (*Freestyle Lite* and *Ascensia Contour*) were also used to study the effect of different brands of glucose meters on the performance of the cocaine sensors.

Streptavidin-coated magnetic beads (1  $\mu\text{m}$  in average diameter) and Amicon-10K/100K centrifugal filters were purchased from Bangs Laboratories Inc. (Fishers, IN) and Millipore Inc. (Billerica, MA), respectively. Grade VII invertase from baker's yeast (*S. cerevisiae*), human recombinant interferon- $\gamma$  (IFN- $\gamma$ ), sulfosuccinimidyl-4-(N-maleimidomethyl)cyclohexane-1-carboxylate (sulfo-SMCC), 1,4-phenylene diisothiocyanate (PDITC), Tris(2-carboxyethyl)phosphine hydrochloride (TCEP) and other chemicals for buffers and solvents were purchased from Sigma-Aldrich, Inc. (St. Louis, MO). The following oligonucleotides were purchased from Integrated DNA Technologies, Inc. (Coralville, IA): (from left to right: 5' to 3')

*Biotin-modified DNA (Biotin-DNA) for cocaine, adenosine, and uranium sensors:*

TCACAGATGAGTAAAAAAAAAAAAA-biotin

*Biotin-modified DNA (Biotin-DNA) for IFN- $\gamma$  sensor:*

Biotin-AAAAAAAAAAAAATCACAGATGAGTAGT

*Thiol-modified DNA (Thiol-DNA) for cocaine and uranium sensors:*

HS-AAAAAAAAAAAAAGTCTCCCGAGAT

*Thiol-modified DNA (Thiol-DNA) for IFN- $\gamma$  sensor:*

HS-AAAAAAAAAAAA CAACCAACCCCA

*Amine-modified DNA (Amine-DNA) for adenosine sensor:*

H<sub>2</sub>N-AAAAAAAAAAAAACCCAGGTTCTCT

*Cocaine aptamer (Coc-Apt):*

TTTTTTACTCATCTGTGAATCTCGGGAGACAAAGGATAAATCCTTCAATGAAGTGGGTCTCCC

*Cocaine aptamer control (inactive Coc-Apt with the above underlined portion truncated):*

TTTTTTACTCATCTGTGAATCTCGGGAGAC

*Adenosine aptamer (Ade-Apt):*

TTTTTTACTCATCTGTGAAGAGAACCTGGGGGAGTATTGCGGAGGAAGGT

*Adenosine aptamer control (inactive Ade-Apt with the above underlined portion truncated):*

TTTTTTACTCATCTGTGAAGAGAACCTGGG

*IFN- $\gamma$  aptamer (IFN- $\gamma$  Apt):*

TGGGGTTGGTTGTGTTGGGTGTTGTGTAAAAAAAAAAAAAAAAACTACTCATCTGTGA

*UO<sub>2</sub><sup>2+</sup>-dependent DNAzyme (39E):*

CACGTCCATCTCTGCAGTCGGGTAGTTAAACCGACCTTCAGACATAGTGAGT

*Substrate of the UO<sub>2</sub><sup>2+</sup>-dependent DNAzyme (39S):*

ACTCATCTGTGAACTCACTATrAGGAAGAGATGGACGTGATCTCGGGAGAC

Buffers used in this work:

Buffer A: 0.1 M NaCl, 0.1 M sodium phosphate buffer, pH 7.3, 0.05% Tween-20

Buffer B: 0.1 M sodium borate buffer, pH 9.2

Buffer C: 0.1 M KCl, 0.001 M MgCl<sub>2</sub>, 0.05% Tween-20, 0.01 M 4-(2-hydroxyethyl)-1-piperazineethanesulfonic acid (HEPES), pH 7.4

Buffer D: 0.2 M NaCl, 0.05 M 2-(N-morpholino)ethanesulfonic acid (MES) buffer, pH 5.5, 0.05% Tween-20

## 2. Procedures for the synthesis of DNA-invertase conjugate (Scheme S1)

Even though invertase has been widely used in industry (Paine, H. S.; Walton Jr., C. F.; Badollet, M. S. *Ind. Eng. Chem.*, **17**, 445-450 (1925)), few approaches to conjugate this enzyme to other functional molecules such as DNA have been published, and even fewer have been explored for analytical applications (Niemeyer, C. M. *Angew. Chem., Int. Ed.*, **49**, 1200-1216 (2010)). Because the active site of invertase is primarily composed of aspartate and glutamate (Reddy, A.; Maley, F. *J. Biol. Chem.*, **271**, 13953-13958 (1996)), the reactive amines of invertase that are not involved in the active site are chosen as the sites for conjugation to preserve the catalytic activity of the enzyme. We tested both sulfosuccinimidyl-4-(N-maleimidomethyl)cyclohexane-1-carboxylate (sulfo-SMCC, see Scheme S1A) and 1,4-phenylene diisothiocyanate (PDITC, see Scheme S1B) as linkers to conjugate

invertase-thiol-modified and amine-modified DNAs, respectively (Hermanson, G. T. *Bioconjugate Techniques*; Elsevier: London, 2008). In the presence of excess DNA, both methods yielded sufficient amounts of DNA-invertase conjugates according to the PAGE shown in Figure S1 and S2. After removing unconjugated DNA by a filter membrane with a 100 kDa molecular-weight threshold, the resulting sample containing DNA-invertase conjugates and trace amounts of free invertase were used for immobilization onto magnetic beads without further purification. The free invertase (invertase without conjugated DNA) was washed away (*vide infra*) before the sensing operation. Note that more than one DNA strand is conjugated to each invertase, and the figures in this work only show one DNA strand for clarity.

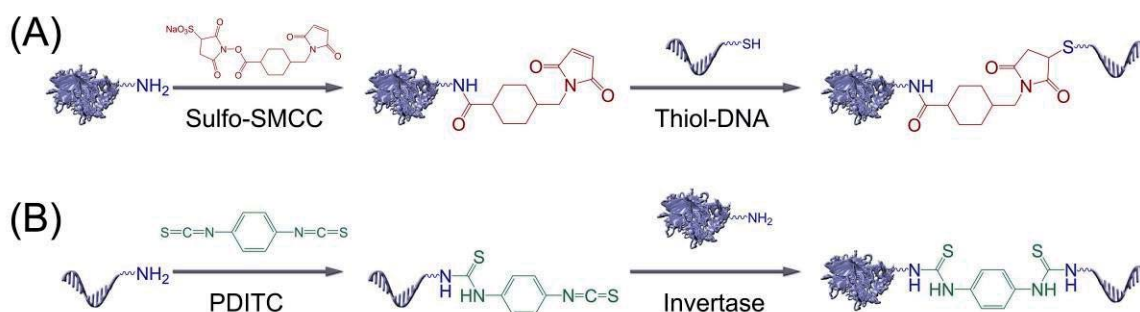

**Scheme S1.** The conjugation of DNA and invertase by (A) the heterobifunctional linker (sulfo-SMCC) and (B) the homobifunctional linker (PDITC).

(1) *Conjugate using heterobifunctional linker sulfo-SMCC (Scheme S1A).* To 30  $\mu\text{L}$  of 1 mM thiol-DNA in Millipore water, 2  $\mu\text{L}$  of 1 M sodium phosphate buffer at pH 5.5 and 2  $\mu\text{L}$  of 30 mM TCEP in Millipore water were added and mixed. This mixture was kept at room temperature for 1 hour and then purified by Amicon-10K using Buffer A without Tween-20 by 8 times. For invertase conjugation, 400  $\mu\text{L}$  of 20 mg/mL invertase in Buffer A without Tween-20 was mixed with 1 mg of sulfo-SMCC. After vortexing for 5 minutes, the solution was placed on a shaker for 1 hour at room temperature. The mixture was then centrifuged and the insoluble excess sulfo-SMCC was removed. The clear solution was then purified by Amicon-100K using Buffer A without Tween-20 by 8 times. The purified solution of sulfo-SMCC-activated invertase was mixed with the above solution of thiol-DNA. The resulting solution was kept at room temperature for 48 hours. To remove un-reacted thiol-DNA, the solution was

purified by Amicon-100K 8 times using Buffer A without Tween-20.

(2) *Conjugate using homobifunctional linker PDITC (Scheme S1B)*. To 60  $\mu\text{L}$  of 1 mM amine-DNA in Millipore water, 30  $\mu\text{L}$  of Buffer B were added and mixed. This solution was further mixed with 20 mg of PDITC dissolved in 1 mL DMF. The resulting solution was placed on a shaker and kept at room temperature in the dark for 2 hours. After that, the solution was mixed with 6 mL of Millipore water and 6 mL 1-butanol. After centrifuging for 15 min, the upper organic phase was discarded. The aqueous phase was then extracted with 4 mL 1-butanol three times, and purified by Amicon-10K using Buffer A without Tween-20 for 8 times to produce a PDITC-activated amine-DNA solution. The PDITC activation ratio was over 90% according to a MALDI-TOF mass spectrum obtained after desalting the DNA product. Then, 10 mg of invertase were added to the activated DNA solution in Buffer A without Tween-20 to reach a final concentration about 5 mg/mL. The resulting solution was kept at room temperature for 48 hours. To remove un-reacted PDITC-activated amine-DNA, the solution was purified by Amicon-100K 8 times using Buffer A without Tween-20.

### 3. PAGE characterization of the DNA-invertase conjugates

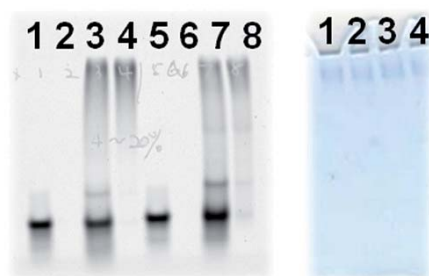

**Figure S1.** Native PAGE (4-20% gradient gel) images for the conjugation products. *Left:* fluorescence image of 1: thiol-DNA and invertase without linker; 2: invertase; 3: thiol-DNA and invertase with linker; 4: 3 after the removal of free DNA; 5: amine-DNA and invertase without linker; 6: invertase; 7: amine-DNA and invertase with linker; 8: 7 after the removal of free DNA. *Right:* protein-staining image of 1: thiol-DNA and invertase without linker; 2: invertase; 3: thiol-DNA and invertase with linker; 4: 3 after the removal of free DNA.

Figure S1 shows the PAGE images of the above conjugation products. The DNA was modified with FAM (fluorescein) so that the DNA and DNA-invertase conjugate could be fluorescently imaged. In another gel, invertase and DNA-invertase conjugate were stained by Coomassie brilliant blue. The DNA-invertase conjugate exhibited a broad fluorescent band (broad because the number of DNAs conjugated to each invertase can vary and the conjugate is very large in molecular weight > 200 kDa) that migrated very slowly, while free invertase was invisible in this fluorescent image. However, in the protein-stained image, very little difference was observed between the DNA-invertase conjugate and free invertase except for the very faint tails (hardly visible in Figure S1) for the conjugate. This could be because the molecular weight of invertase (135~270 kDa) was too large for migration in PAGE even if the protein was conjugated to DNA (7 kDa). To enhance the migration of invertase on PAGE for the differentiation between invertase and invertase-DNA conjugate, an SDS-PAGE experiment was conducted using invertase and thiol-DNA invertase conjugate (Figure S2). The molecular weight of invertase is around 135K according to the literature, which is in agreement with the location of the band on the gel (between 85K and 175K). Upon conjugation with DNA, the migration of the DNA-invertase conjugate band was less than that of invertase because the conjugation increased the molecular weight of the enzyme (each DNA is around 7K and there should be more than 20 amine groups in each invertase for conjugation with DNA). No effect of protein concentration and DTT was observed on the SDS-PAGE.

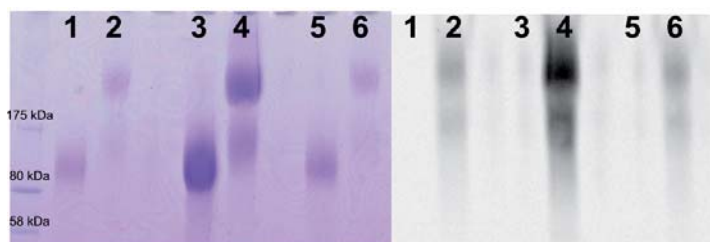

**Figure S2.** SDS PAGE (4-20% gradient gel) images of invertase/DNA-invertase. *Left:* protein-staining image and *right:* fluorescence imaging of 1: invertase; 2: DNA-invertase conjugate; 3: 5X concentration of invertase; 4: 5X concentration DNA-invertase conjugate; 5: invertase with DTT; 6: DNA-invertase conjugate with DTT.

#### 4. Preparation of the DNA-invertase-immobilized magnetic beads for the detection of targets using a commercially available personal glucose meter (PGM)

Thiol-DNA and amine-DNA conjugated invertase synthesized as mentioned above were used to prepare DNA-invertase-immobilized magnetic beads in Buffer A for cocaine and adenosine detections, respectively; for interferon- $\gamma$  (IFN- $\gamma$ ) and  $\text{UO}_2^{2+}$  detections, thiol-DNA conjugated invertase was used. For the IFN- $\gamma$  detection, the thiol-DNA-conjugated invertase was buffer-exchanged to Buffer C by using the Amicon-100K twice. For the  $\text{UO}_2^{2+}$  sensor, to avoid the strong interaction between  $\text{UO}_2^{2+}$  and phosphate anions, the thiol-DNA conjugated invertase was buffer-exchanged to Buffer D by using the Amicon-100K three times. A portion of 1 mL 1 mg/mL solution of streptavidin-coated magnetic beads (MBs) was placed close to a magnetic rack for 1 minute. The clear solution was discarded and replaced by 1 mL of Buffer A, C or D (Buffer A, C and D were used for the cocaine/adenosine aptamer, IFN- $\gamma$  aptamer and  $\text{UO}_2^{2+}$  DNAzyme sensors, respectively. For  $\text{UO}_2^{2+}$  DNAzyme sensor, the MBs were soaked in Buffer C with additional 100 mM NaCl overnight before use to ensure the removal of the phosphate anions that adsorbed on the surface of MBs during storage, because MBs were purchased as solutions in PBS buffer and phosphate anions can compete with the binding between  $\text{UO}_2^{2+}$  and the DNAzyme). This buffer exchange procedure was repeated twice. Then, 12  $\mu\text{L}$  0.5 mM Biotin-DNA in Millipore water was added to the MB solution and well mixed for 30 minutes at room temperature. After that, the MBs were washed twice using buffer to remove excess biotin-DNA. Later, 12  $\mu\text{L}$  of 0.5 mM functional DNA (Coc-Apt, Ade-Apt, IFN- $\gamma$  aptamer, or a mixture of equal amounts of 39S and 39E) in Millipore water were added to the MB solution and well mixed for 30 minutes at room temperature. After three times washing using buffers to remove excess DNA, DNA-invertase conjugate in buffer (about 20 mg/mL) was added to the solution and well mixed at room temperature for 30 minutes. Excess DNA-invertase conjugate was washed off by buffers three times and was recycled for further use by condensing the washing solutions using an Amicon-100K. The DNA-invertase-immobilized MBs were then dispersed in 1 mL of Buffer A, C or D. After the removal of buffers, the MBs contained in each 60  $\mu\text{L}$  aliquot of this solution were used to detect one sample. The preparation can easily be scaled up by increasing the amount of materials but maintaining the same mass ratio. For detections in human serum and calf blood

samples, the dilution was done using the corresponding buffer of the target, and the MBs were washed twice by the serum or blood samples free of any target.

## 5. Procedures for cocaine, adenosine, IFN- $\gamma$ , and $\text{UO}_2^{2+}$ detection using a commercially available PGM

Unless stated otherwise, the standard procedures for the detection of the four targets using an *ACCU-CHEK Avia* glucose meter at room temperature (25 °C) were as follows: For detection using the aptamer sensors, 20  $\mu\text{L}$  of Buffer A (for cocaine and adenosine sensors) or C (for the IFN- $\gamma$  sensor) containing a proper amount of the target was added to the DNA-invertase-conjugate-immobilized MBs prepared as above and well mixed for 15 minutes (Note that the concentration of MBs in the buffer is now about 3 mg/mL, which is for a higher concentration of released enzyme to produce glucose faster for glucose meter detection). After that, the solution was separated using a magnetic rack and 10  $\mu\text{L}$  of the supernatant was transferred into 3.3  $\mu\text{L}$  of 2 M sucrose in Buffer A. After standing at room temperature for 15 minutes (for cocaine and adenosine sensors) or 30 minutes (for the IFN- $\gamma$  sensor), 5  $\mu\text{L}$  of the solution was measured using a commercially available PGM. To detect cocaine in 20% human serum, the reaction time was the same as that in buffer. The time was extended to 30 min for the cocaine detections in 50% and undiluted human serum, while further extended to 60 min for those in 50% and undiluted calf blood. For  $\text{UO}_2^{2+}$  detection using the DNAzyme sensor, 20  $\mu\text{L}$  of Buffer D containing the proper amount of  $\text{UO}_2^{2+}$  was added to DNA-invertase-immobilized MBs prepared as above and well mixed for 30 minutes. After that, the solution was separated using a magnetic rack. About 0.1  $\mu\text{L}$  of 1.5 M NaOH was added to 10  $\mu\text{L}$  of the supernatant to adjust the pH to 7 (This is necessary because the glucose meter can only detect glucose in a solution of neutral pH). The transferred supernatant was then mixed with 3.3  $\mu\text{L}$  of 2 M sucrose in Buffer A containing 4 mM EDTA. After standing at room temperature for 30 min, 5  $\mu\text{L}$  of the solution was measured using a commercially available PGM.

## 6. Optimized procedure for cocaine detection

(a) *Effect of incubation time with target:* The kinetics of DNA-invertase release upon the addition of cocaine was studied. After mixing the above cocaine sensor system with samples containing cocaine, the



DNA-invertase modified MBs were removed at different time intervals. The resulting solutions were mixed with sucrose and the glucose produced was detected by a PGM. As shown in Figure S3, the final PGM signals increased rapidly for the first 5 min of incubation with cocaine, but then became saturated until 20 min. Therefore, 5 min incubation time was actually enough for the release of DNA-invertase from the MBs by the target. To ensure an efficient release, we used 15 min incubation time with cocaine in the standard procedure.

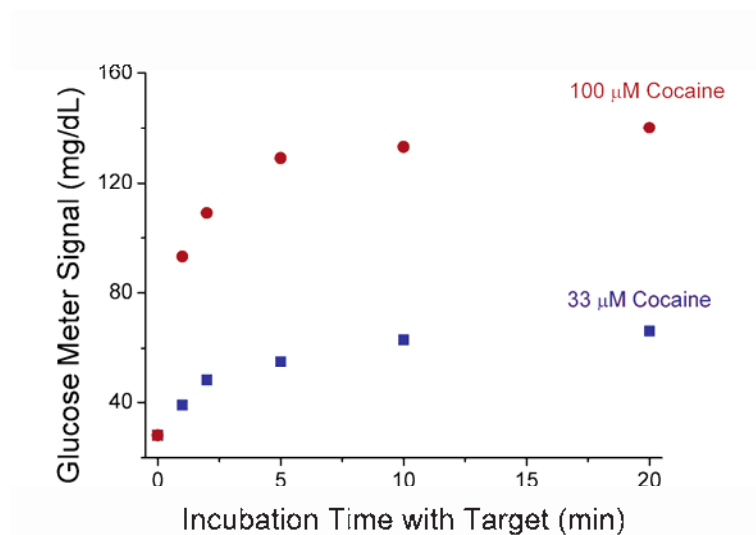

**Figure S3.** Detection of cocaine in Buffer A using a PGM with different incubation time of the DNA-invertase modified MBs with cocaine.

(b) *Effect of reaction time with sucrose:* The kinetics of invertase-catalyzed production of glucose from sucrose was also studied. The results showed that the amount of glucose produced was proportional to the reaction time with sucrose (Figure S4). To ensure samples with no or very low concentrations of cocaine could give a detectable signal in a PGM, 15 min reaction time with sucrose was used in the standard procedure.

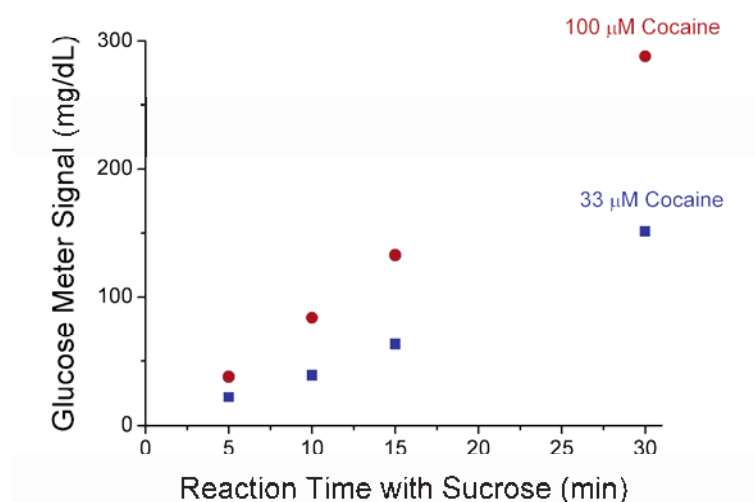

**Figure S4.** Detection of cocaine in Buffer A using a PGM with different reaction time of the released DNA-invertase with sucrose.

(c) *Effect of sucrose concentration:* The concentration of sucrose used for the invertase-catalyzed production of glucose also played a role in the final signal obtained by a PGM. As shown in Figure S5, 0.5 M final sucrose concentration was used in the standard procedure because it gave the highest signals in a PGM.

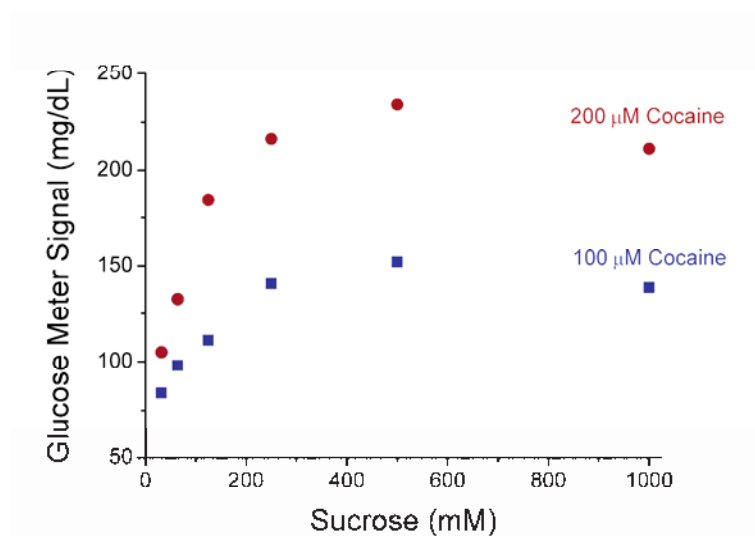

**Figure S5.** Detection of cocaine in Buffer A using a PGM with the released DNA-invertase reacting with different concentrations of sucrose.

(d) *Effect of operation temperature:* Because the immobilization of DNA-invertase to the MBs was based on DNA hybridization, whose affinity was temperature dependent, the temperature could affect

the cocaine detection. To evaluate the effect of temperature, we carried out the cocaine detection under different temperatures (Figure S6). The method was found to be applicable at least in the temperature range of 20~30 °C. When the temperature was either too low (4 °C) or too high (40 °C), the performance obviously decreased, because at 4 °C, the release of DNA-invertase by cocaine was harder than room temperature, while at 40 °C, the DNA hybridization (the  $T_m$  of the DNA conjugated to invertase is about 48 °C) was not as strong and the sensor system became not as stable compared to that at room temperature.

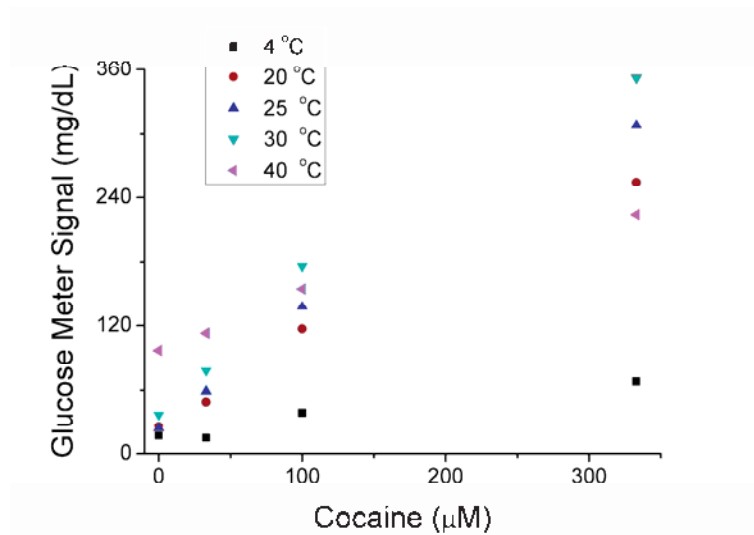

**Figure S6.** Detection of cocaine in Buffer A using a PGM at different temperatures.

(e) *Actual glucose concentration v.s. signal from PGM:* The signal obtained from the PGM and the actual concentration of glucose present in the sample was also compared to confirm the accuracy of the PGM detection in different buffer mediums. It was found that the PGM signal was proportional to the actual glucose concentration in the samples, such as Buffer C, Buffer A, 20%, 50% and 100% human serum (Figure S7).

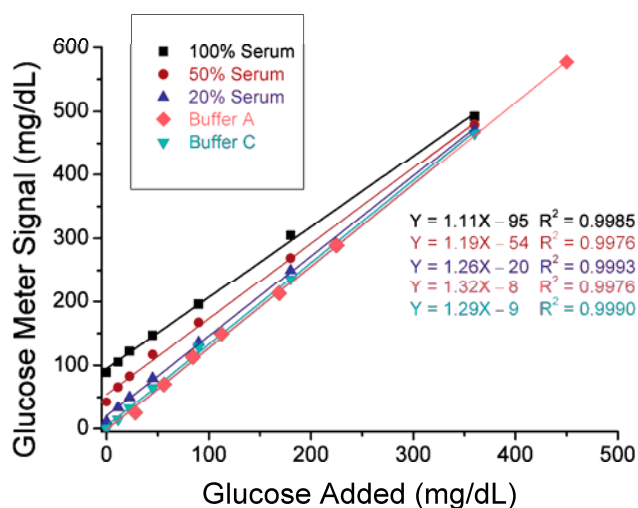

**Figure S7.** Correlation between the actual glucose concentration and that detected by a PGM in Buffer A, Buffer C and human serum diluted by different amounts of Buffer A.

(f) *Stability of DNA-invertase modified MBs upon storage:* For the end user's freedom in choosing the time of using the sensor system, the DNA-invertase modified MBs should be stable for storage for a sufficient period of time. We carried out a stability test of the modified beads for the detection of cocaine. It was found that the performance of the sensor did not undergo significant changes for at least 2 weeks when stored at 4°C (Figure S8).

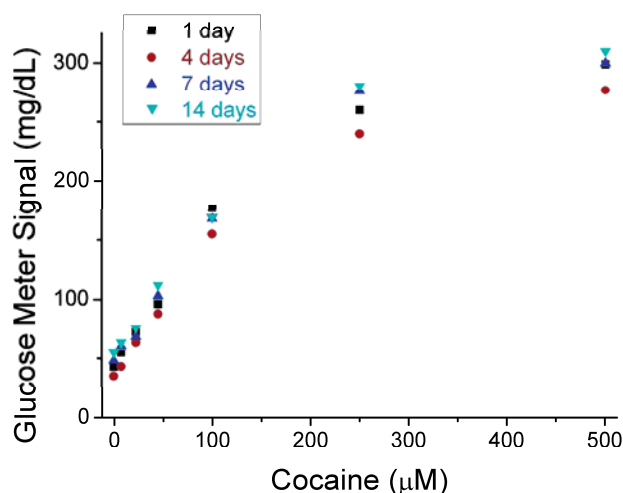

**Figure S8.** Detection of cocaine in 50% human serum using a PGM by the DNA-invertase modified MBs after different periods of storage at 4 °C.

(g) *Use of different brands of glucose meters:* different brands of glucose meters may have different

responses for the same sample because their designs and specifications vary from each other. By using three different brands of glucose meters (*ACCU-CHEK Avia*, *Freestyle Lite* and *Ascensia Contour*) to do cocaine detection in human serum according to the standard procedure in this work, we found that they gave similar trend of signal enhancement for the samples containing increasing concentrations of cocaine, though the absolute values were different. The reason for this difference is most probably because of the different techniques used by different suppliers for the fabrication of glucose meter strips. The strips are calibrated by the suppliers for glucose detections in human blood but not for those in other aqueous samples such as buffers, serums and calf blood that were used in this work, so they may give different absolute values but still show very similar trends. Therefore, the detection can be done using the same brand of glucose meter to avoid the variations or using different brands after calibration. For all the other tests in this work, the *ACCU-CHEK Avia* glucose meter was used.

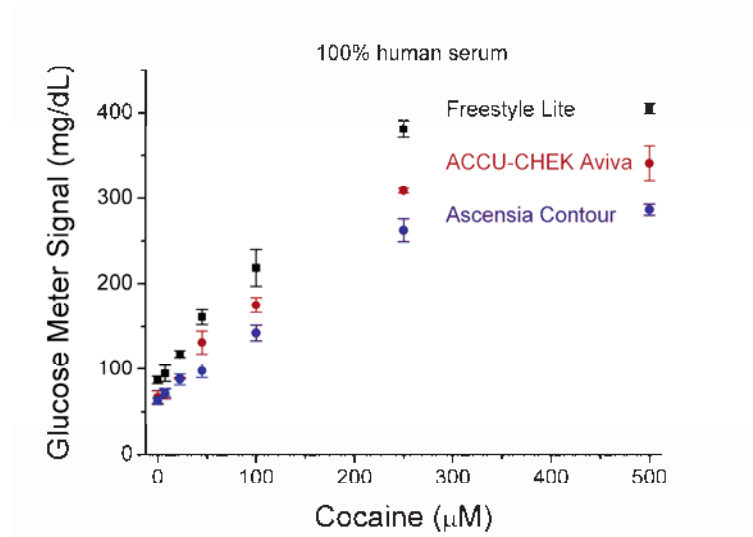

**Figure S9.** Detection of cocaine in human serum using different brands of glucose meters.

## 7. Other Supplementary figures for cocaine detections

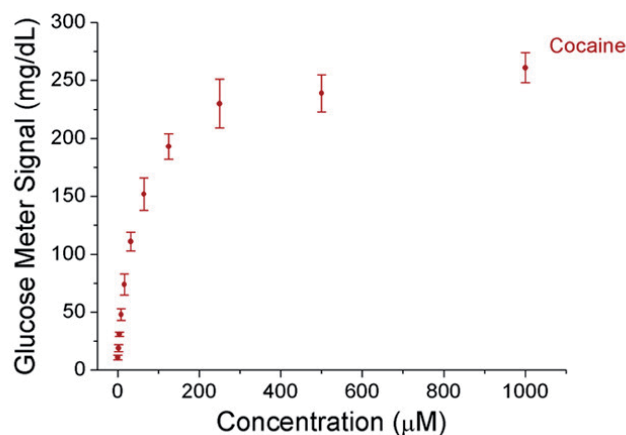

**Figure S10.** Detection of cocaine in 20% human serum using a PGM.

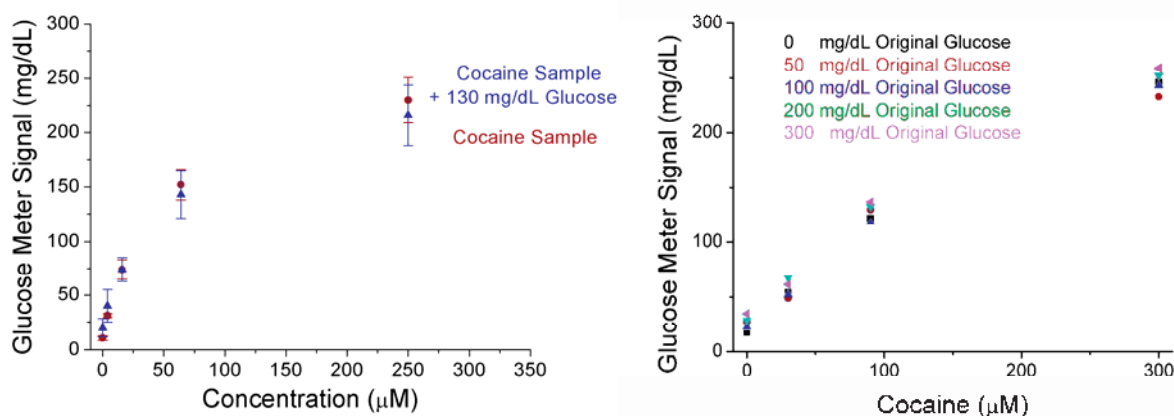

**Figure S11.** *Left:* Detection of cocaine in Buffer A containing 130 mg/dL of original glucose using a PGM. *Right:* Detection of cocaine in Buffer A containing different concentrations of original glucose using a PGM. The glucose meter signals were subtracted with the signals obtained by calibration tests of the buffers mixing with sucrose.

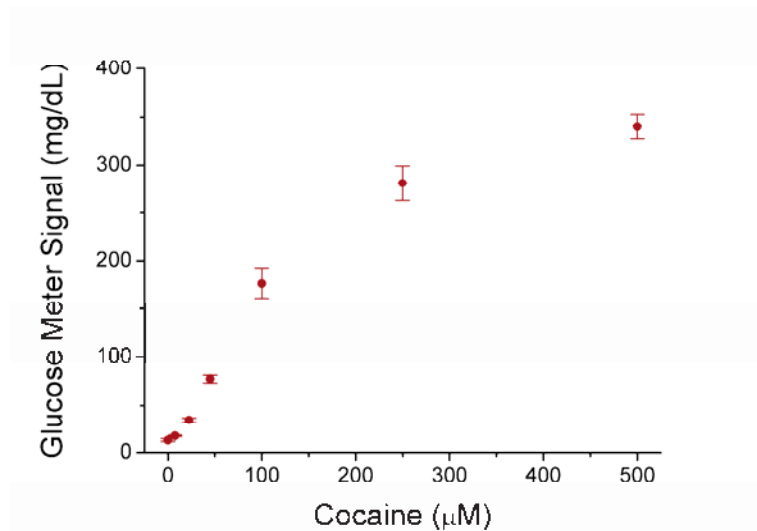

**Figure S12.** A short time approach by using 8 mg/dL DNA-invertase modified MBs for the detection of cocaine in Buffer A. The total time for each test could be reduced to no more than 15 min.

**8. Simplifying the sensing procedure into a single step before PGM detection (A video demon is also available as Supplementary Information to show that one test using Method B for 100 μM cocaine can be finished within 15 minutes when using 8 mg/mL MBs with the syringe)**

**(1) Method A:**

*Sensor preparation:* 200 μL of the DNA-invertase immobilized magnetic beads (1 mg/mL) solution prepared according to the protocols described above in Buffer A were transferred to a 1 mL syringe, and a 0.45 μm pore-sized Millipore Millex-HV syringe filter (the filter is soaked in the Buffer A overnight before use for the passivation of the filter to minimize enzyme adsorption during filtration) was attached to the syringe. After removal of the solution phase by the filter and syringe, the DNA-invertase immobilized magnetic beads remained in the syringe.

*Sensing Procedure:* 100 μL of cocaine sample in Buffer A was added to the syringe and with mild shake by hand to disperse the magnetic beads into the cocaine sample. After 10 min, the solution phase was pulled out into a tube with 9 mg sucrose powder and well mixed. Then, the solution was tested by a glucose meter after 15 minutes. The results of the tests of samples containing different amounts of cocaine were shown in Figure S13.

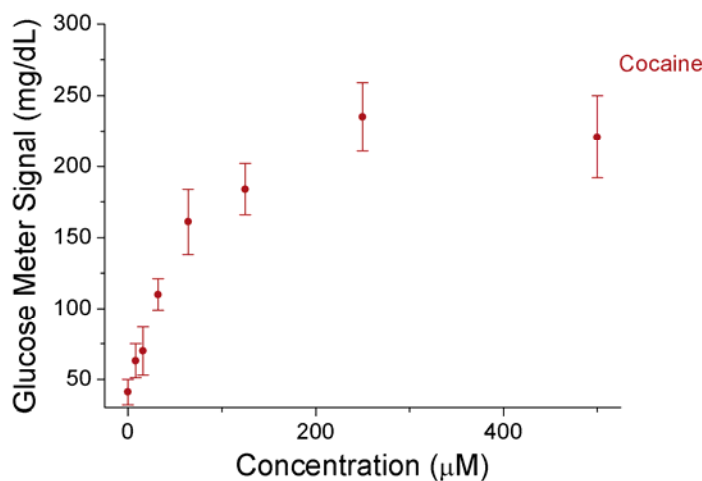

**Figure S13.** Detection of cocaine in Buffer A using the simplified Method A.

**(2) Method B:**

*Sensor preparation:* 400  $\mu\text{L}$  of the DNA-invertase immobilized magnetic beads (1 mg/mL) solution prepared according to the protocols described above in Buffer A or 50% human serum were concentrated to 40  $\mu\text{L}$  and kept in a tube. A 0.22  $\mu\text{m}$  pore-sized Millipore Millex-GV syringe filter (the filter is soaked in the Buffer A or 50% human serum for 2 h before use for the passivation of the filter to minimize enzyme adsorption during filtration).

*Sensing Procedure:* 200  $\mu\text{L}$  of cocaine sample in Buffer A or 50% human serum was transferred by a 1 mL syringe and then injected into the 40  $\mu\text{L}$  concentrated MBs and then 200  $\mu\text{L}$  adsorbed into the syringe. After mild shake of the syringe by hand for a few seconds to disperse the magnetic beads solution, the syringe was put on the bench for 10 min. Then, the syringe was capped by the Millipore Millex-GV syringe filter and the solution was pulled out into another tube containing 50  $\mu\text{L}$  2 M sucrose. After 20 min, the solution was tested by a glucose meter. The results of the tests of samples containing different amounts of cocaine were shown in Figure S14.



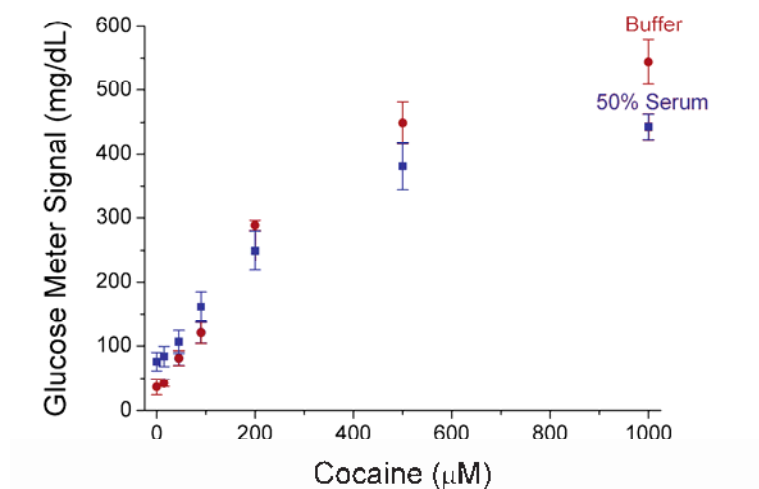

**Figure S14.** Detection of cocaine in Buffer A and 50% human serum using the simplified Method B.

**9. Possible reasons for the PGM signal saturated at a lower IFN- $\gamma$  concentration in 20% serum than in Buffer C.**

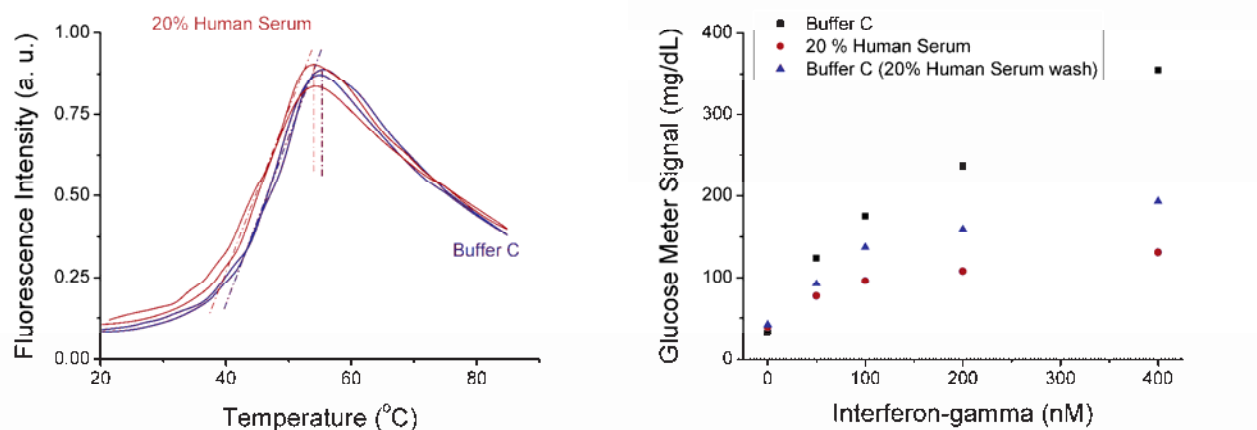

**Figure S15.** *Left:* Melting temperature study of DNA hybridization (Cy3 and BHQ labeled) in Buffer C and 20% human serum. The drop of fluorescence in the high temperature region (60~80 °C) is because of the property of the Cy3 fluorophore, while DNA hybridization is minimized at this high temperature range and should not contribute to the fluorescence decrease. *Right:* The effect of washing by Buffer C containing 20% human serum on the performance of interferon-gamma detection in buffer using a PGM.
